# Supplementary material for: Comparison of Prehospital Vascular Access Strategies and Their Impact on Survival in Out-of-Hospital Cardiac Arrest
Source: Research Square preprint supplement (doi:10.21203/rs.3.rs-7080822/v1), 2025-07-23
Supplement: Supplementary file 1 [file 5882f69b11ebf3ba9c2ce6dd.docx]

**Supplementary Tables**

Supplementary Table S1 Univariate analysis: the estimated odds ratio by simple logistic regression.

|  | pre hospital ROSC | | Survival over 2 hours | | Survival to discharge | | Good CPC | |
| --- | --- | --- | --- | --- | --- | --- | --- | --- |
| OR(95% CI) | p-value | OR(95% CI) | p-value | OR(95% CI) | p-value | OR(95% CI) | p-value |
| Treatment group |  |  |  |  |  |  |  |  |
| No access attempt | Reference |  | Reference |  | Reference |  | Reference |  |
| IO | 1.83(1.38-2.41) | **<0.001** | 1.43(1.17-1.74) | **<0.001** | 1.83(1.43-2.34) | **<0.001** | 1.40(1.03-1.91) | **0.033** |
| IV | 1.47(1.16-1.87) | **0.001** | 1.16(1.04-1.37) | **0.043** | 1.34(1.01-1.67) | **0.032** | 1.05(0.80-1.37) | 0.735 |
| Failed IV | 0.59(0.32-1.86) | 0.086 | 0.85(0.61-1.17) | 0.318 | 0.80(0.50-1.28) | 0.358 | 0.49(0.25-0.97) | **0.040** |
| w/ Epinephrine vs. w/o E | 1.43(1.15-1.78) | **0.001** | 1.09(0.94-1.28) | 0.262 | 1.54(1.11-1.91) | **0.021** | 1.56(1.13-1.96) | **<0.001** |
| Age | 0.98(0.98-0.99) | **<0.001** | 0.99(0.98-0.99) | **<0.001** | 0.98(0.97-0.98) | **<0.001** | 0.97(0.96-0.98) | **<0.001** |
| Gender (F vs. M) | 1.00(0.80-1.24) | 0.982 | 0.99(0.86-1.15) | 0.944 | 0.98(0.80-1.19) | 0.823 | 0.82(0.64-1.05) | 0.112 |
| Witness (Y vs. N) | 3.42(2.76-4.24) | **<0.001** | 2.68(2.32-3.09) | **<0.001** | 3.22(2.64-3.92) | **<0.001** | 3.18(2.50-4.04) | **<0.001** |
| Public vs. Residential | 0.96(0.77-1.20) | 0.729 | 1.06(0.92-1.23) | 0.404 | 0.98(0.80-1.20) | 0.852 | 0.90(0.71-1.16) | 0.424 |
| CAC vs. non-CAC | 1.96(1.35-2.85) | **<0.001** | 1.26(0.94-1.71) | 0.126 | 1.90(1.33-2.70) | **<0.001** | 2.18(1.47-3.25) | **<0.001** |
| BVM vs. SGA | 1.93(2.39-1.56) | **<0.001** | 1.88(2.19-1.61) | **<0.001** | 2.42(2.95-1.99) | **<0.001** | 2.77(3.50-2.19) | **<0.001** |
| AED use (Y vs. N) | 0.51(0.36-0.71) | **<0.001** | 0.84(0.64-1.10) | 0.210 | 0.61(0.44-0.85) | **0.003** | 0.47(0.33-0.67) | **<0.001** |
| Shockable vs. Non-shockable rhythm | 1.57(1.07-2.31) | **0.022** | 1.21(0.90-1.63) | 0.195 | 1.23(0.84-1.82) | 0.291 | 1.71(1.13-2.60) | **0.012** |

Significance are shown in bold.

Supplementary Table S2

| **Outcome** | **Group** | **Estimated probability** | **95% CI for est.prob.** | |
| --- | --- | --- | --- | --- |
| LB | UB |
| **Pre-hospital ROSC** | No access attempt | 7.54% | 6.51% | 8.71% |
|  | IO w/o E | 12.80% | 10.27% | 15.84% |
|  | IO w/ E | 13.26% | 10.22% | 17.03% |
|  | IV w/o E | 10.56% | 8.69% | 12.77% |
|  | IV w/ E | 10.94% | 8.80% | 13.54% |
|  | Failed IV | 4.60% | 2.63% | 7.92% |
| **Survival over 2 hours** | No access attempt | 21.45% | 19.79% | 23.20% |
|  | IO w/o E | 26.80% | 23.31% | 30.60% |
|  | IO w/ E | 30.48% | 26.09% | 35.27% |
|  | IV w/o E | 22.71% | 20.06% | 25.60% |
|  | IV w/ E | 26.04% | 22.83% | 29.52% |
|  | Failed IV | 18.78% | 14.49% | 23.98% |
| **Survival to discharge** | No access attempt | 9.83% | 8.66% | 11.13% |
|  | IO w/o E | 13.75% | 11.16% | 16.83% |
|  | IO w/ E | 22.18% | 18.02% | 27.00% |
|  | IV w/o E | 7.72% | 6.20% | 9.58% |
|  | IV w/ E | 13.02% | 10.68% | 15.79% |
|  | Failed IV | 8.05% | 5.30% | 12.03% |
| **Good CPC** | No access attempt | 6.82% | 5.84% | 7.94% |
|  | IO w/o E | 7.68% | 5.79% | 10.12% |
|  | IO w/ E | 12.44% | 9.33% | 16.42% |
|  | IV w/o E | 5.61% | 4.31% | 7.28% |
|  | IV w/ E | 9.22% | 7.23% | 11.69% |
|  | Failed IV | 3.45% | 1.80% | 6.49% |

Abbreviation: est. prob., estimate probability
